# Supplementary material for: DnFCA Isoforms Cooperatively Regulate Temperature-Related Flowering in Dendrobium nobile
Source: MDPI journal article supplement (doi:10.3390/biology12020331), 2023-02-19
Supplement: s1 [file s1]

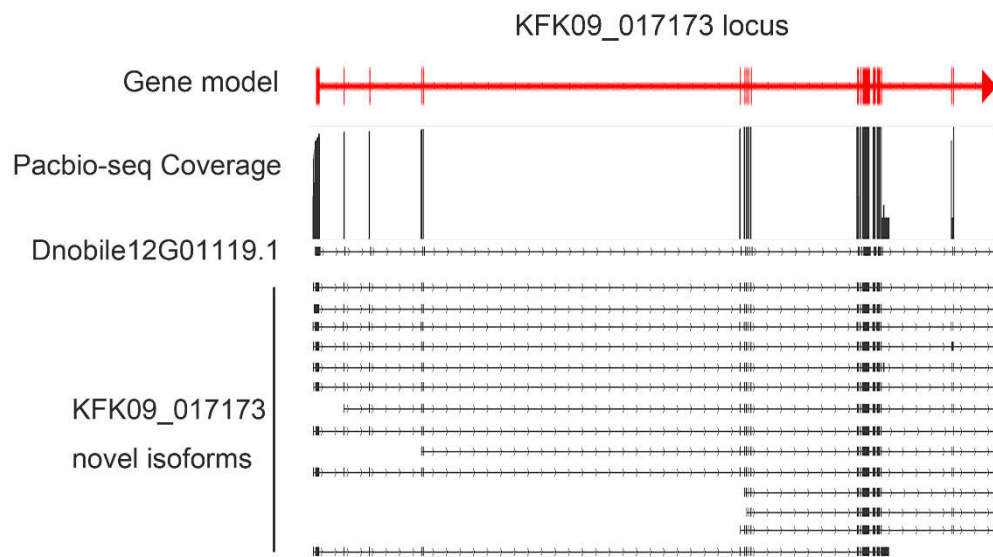

**Figure S1. The isoforms of the KFK09\_017173 locus of the *D. nobile* genome.** KFK09\_017173 contains coding region for a putative DnFCA protein. A total of 15 isoforms were identified for this locus based on data from PacBio sequencing of mixed AXBs (unpublished data). The Dnobile12G01119.1 is the representative transcript model for this locus and is also confirmed to express in AXBs by PacBio sequencing. Other 14 isoforms were predicted based on the alignment analysis of sequences against the reference genome of *D. nobile* (GCA\_022539455.1). The arrowheads indicate the 5' → 3' direction of the putative *DnFCA* gene or transcript isoform. Black blocks in the isoform models and red blocks in the gene model represent exons, black lines in the isoform models and red lines in the gene model represent introns. The coverage of PacBio sequences to the representative gene model are shown as black peaks.

Sequence beta got Fickett score 0.47633 with a complete putative ORF 168 AA, a pI 9.40911865234, which, in total, classify it as a coding sequence with coding probability 0.989955.

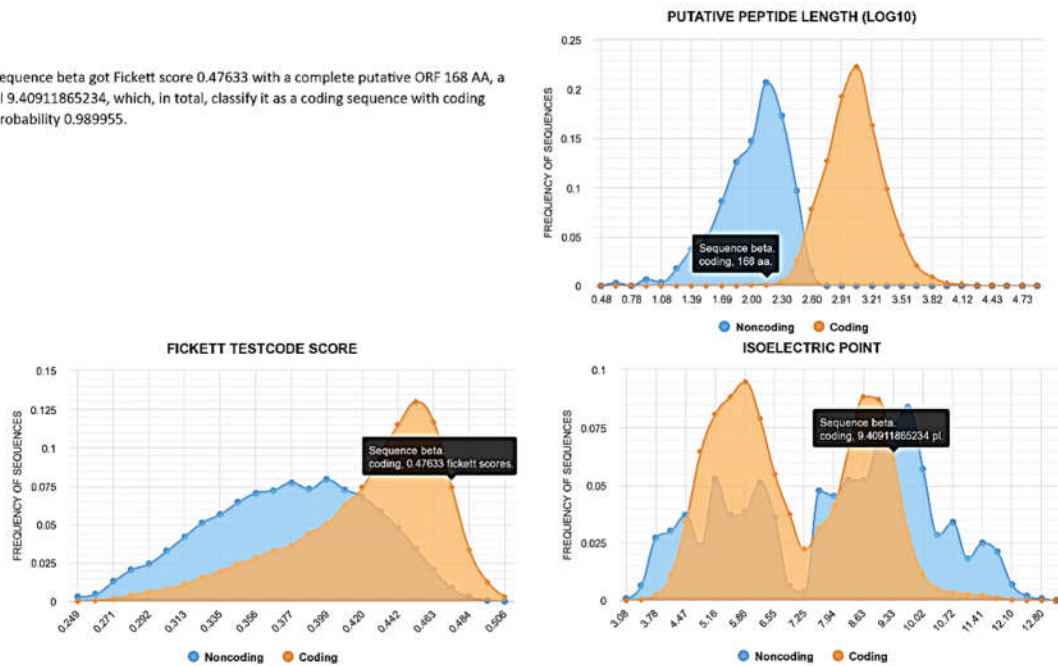

**Figure S2. Protein coding potential of the *DnFCA $\beta$*  isoform.** The potential of *DnFCA $\beta$*  isoform was analyzed using CPC2 at <http://cpc2.gao-lab.org/> using default parameters. The peptide length and isoelectric point of *DnFCA $\beta$*  were computed, and the Fickett score was 0.4763. The *DnFCA $\beta$*  was classified as a protein-coding sequence with a probability up to 0.9899.

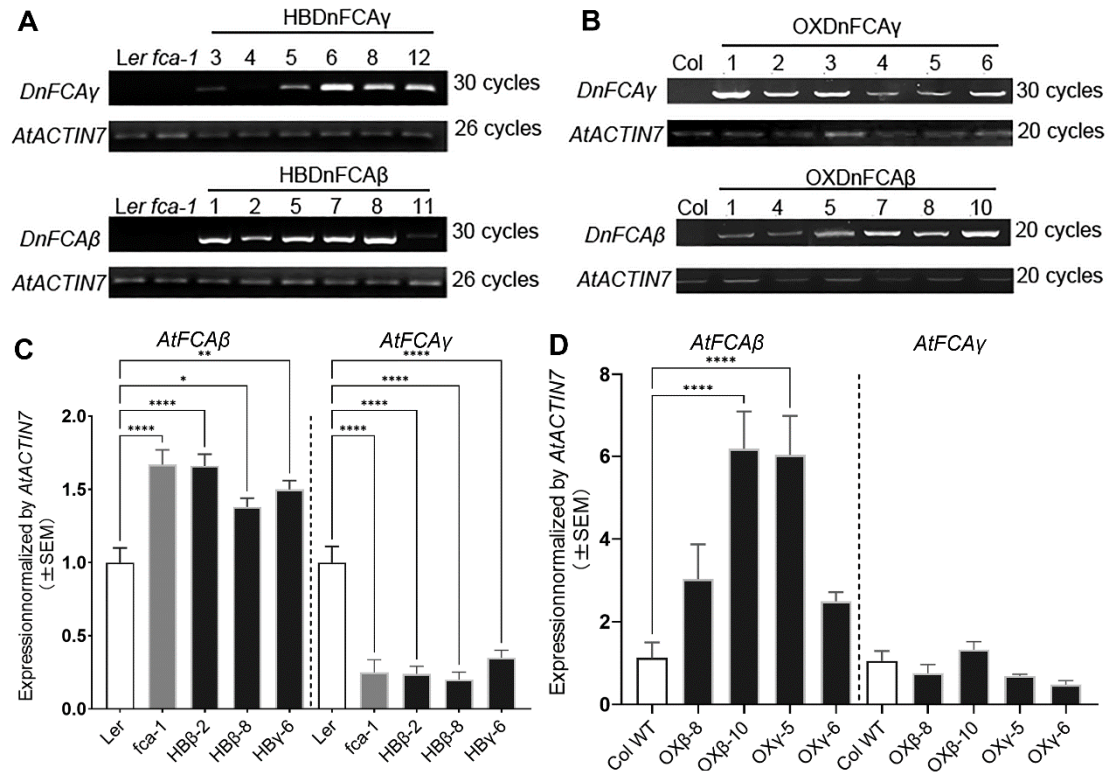

**Figure S3. Expression verification of the *DnFCA* and *AtFCA* isoforms in the transgenic *Arabidopsis* lines.** (A-B) Overexpression of *DnFCA $\gamma$*  or *DnFCA $\beta$*  in OX (B) and HB (A) lines. 15-day-old seedlings of the six homozygous lines were collected and total RNA was extracted, followed by reverse transcription for 1  $\mu$ g total RNA in a final volume of 20  $\mu$ l. 1  $\mu$ l resultant RT product was used for a semi-quantitative PCR reaction in a final volume of 20  $\mu$ l. The gene specific primers corresponding to *DnFCA $\gamma$*  or *DnFCA $\beta$*  isoform are listed in Table S1. The gene of *AtACTIN7* served as the endogenous control for expression normalization. PCR reactions stopped after running for the indicated thermal cycles and 5  $\mu$ l PCR products were tested by electrophoresis on 1% agarose gel. (C-D) Expression of *AtFCA $\gamma$*  and *AtFCA $\beta$*  isoform in *DnFCA* OX (D) and HB (C) lines. Transgenic *Arabidopsis* with high expression of the exogenous genes of *DnFCA $\gamma$*  or *DnFCA $\beta$*  were selected for this experiment. Total RNA was extracted from 15-day-old seedlings and 1  $\mu$ g of the extractive products was reverse transcribed into cDNA in a 20  $\mu$ l reaction. 0.5  $\mu$ l cDNA was used as a template in qPCR reaction with a reaction with final volume of 20  $\mu$ l. qPCR reactions were run in Bio-Rad C1000 Thermo-cycler. The *AtACTIN7* was used as internal control for expression normalization. Expression of each tested gene in wild-type plants was set to 1 and used as the comparing control. One-way ANOVA was performed to identify the significant differences. All HB lines were compared with the *Ler* wild type and the *fca-1* mutant. OX lines were compared with the *Col* wild type. The strength of significance is indicated by \* $p$ <0.05, \*\* $p$ <0.01 or \*\*\*\* $p$ <0.0001.

**Table S1. Primers used in this study.**

| primer            | sequence (5'→3')                                |
|-------------------|-------------------------------------------------|
| qDnFT-F           | GCCAAGCCTAGGCATACATCGC                          |
| qDnFT-R           | CAGTCTTGCATTCTTCTCCGCC                          |
| qDnAGL19-F        | CTCTGCTGTGCCTAAATGCT                            |
| qDnAGL19-R        | AACTGTTGGGTTCTTCTCTCC                           |
| qDnAPL1-F1        | TCTTACTCGGGTGAATAGCAACAGC                       |
| qDnAPL1-R1        | TAGCCGGATTGTGATTAGCTCGCATT                      |
| realtimeDnFCA-β-F | TATGGTGAGGGAAACAAA                              |
| realtimeDnFCA-β-R | AAGAAAACCACAATTTATCACGA                         |
| realtimeDnFCA-γ-F | GCAACGGGACCTATTCAAG                             |
| realtimeDnFCA-γ-R | CCACGACTCTGTTTCATCTCA                           |
| qDnUBQ-F          | AAAGGCTCATCTTTGCCGGT                            |
| qDnUBQ-R          | CTCTTAGCCACCATCACCAAATTGC                       |
| anchor Oligo(dT)  | ATTCTAGAGCCGAGGCGCCGACATG-d(T) <sub>30</sub> VN |
| 3' PCR Primer     | ATTCTAGAGCCGAGGCGCCGACATG                       |
| Dn FCA-γ-F        | GAGCAGATAACAGCGGAGC                             |
| Dn FCA-γ-R        | CTCGTTAAAGATTCAAAAGTCGTAGC                      |
| Dn FCA-β-F        | CAACCTCTCGAATACGATGGACAG                        |
| Dn FCA-β-R        | GATCCCCAAGCCTCAAAG                              |
| AtcFLC_F236       | GTCGCTCTTCTCGTCGTCTC                            |
| AtcFLC_R427       | TCCCACAAGCTTGCTATCCAC                           |
| ATcSOC1-_F517     | CTCTCAGTGCTTTGTGATGCTG                          |
| ATcSOC1-_R686     | TTCAAATGCTGCATATTTTCTTCAG                       |
| AtcFT_F249        | TTGGTGGAGAAGACCTCAGGA                           |
| AtcFT_R393        | TCATTGCCAAAGGTTGTTCCAG                          |
| AtcAP1_F340       | TGCTCTTGTTGTCTTCTCCCA                           |
| AtcAP1_R485       | ACCAGTTTGTATTGACGTCGGA                          |
| qAtACT7-F2        | AGATCACCGCTCTTGACACCT                           |
| qAtACT7-R2        | ACTCACTCTTTGAAATCCACATCTGTT                     |

**Table S2. Flowering phenotypes of *DnFCAγ* transgenic *Arabidopsis*.**

| Line #           | Generation | n  | RL                        | Flowering time           |
|------------------|------------|----|---------------------------|--------------------------|
| <b>Long-day</b>  |            |    |                           |                          |
| Col              | T3         | 12 | 8.54±0.72                 | 33.56±2.46               |
| OXγ-1            | T3         | 12 | 8.23±0.86                 | 33.48±2.72               |
| OXγl-2           | T3         | 12 | 8.11±0.83                 | 31.79±2.65               |
| Col              | T3         | 12 | 7.79±0.51                 | 29.10±1.85               |
| OXγl-5           | T3         | 12 | 8.42±1.14                 | 31.69±2.88**             |
| OXγ-6            | T3         | 12 | 8.39±1.196                | 31.15±2.93               |
| Col              | T3         | 12 | 8.21±1.03                 | 29.53±2.64               |
| OXγ-3            | T3         | 12 | 7.89±0.77                 | 30.45±2.53               |
| OXγl-4           | T3         | 12 | 7.79±0.41                 | 28.21±1.69               |
| Col              | T4         | 12 | 9.25±0.68                 | 30.23±1.98*              |
| OXγl-1           | T4         | 12 | 8.64±0.79*                | 31.76±2.51*              |
| OXγ-2            | T4         | 12 | 8.72±0.67*                | 33.39±2.12**             |
| OXγ-3            | T4         | 12 | 8.9±0.73*                 | 32.53±2.843*             |
| OXγ-4            | T4         | 12 | 8.75±0.68*                | 31.94±2.58*              |
| Col              | T4         | 8  | 5.875±0.35                | 29.63±1.06               |
| OXγ-1            | T4         | 12 | 5.08±0.29**               | 31.00±0.43**             |
| OXγ-2            | T4         | 12 | 5.58±0.51                 | 30.67±1.07*              |
| <i>Ler</i>       | T3         | 11 | 5.82±0.75                 | 30.45±0.82               |
| <i>fca-1</i>     | T3         | 12 | 7.17±1.03**               | 32.75±0.75**             |
| HBγ-6            | T3         | 12 | 6.83±0.72**               | 32.83±0.83**             |
| <i>Ler</i>       | T4         | 11 | 7.18±0.60                 | 29.09±1.58               |
| <i>fca-1</i>     | T4         | 12 | 9.83±0.72 <sup>a</sup>    | 37.92±3.50 <sup>a</sup>  |
| HBγ-6            | T4         | 18 | 10.33±0.76 <sup>a</sup>   | 39.61±3.52 <sup>a</sup>  |
| HBγ-8            | T4         | 16 | 10.75±0.74 <sup>ab</sup>  | 41.38±1.82 <sup>ab</sup> |
| <b>Short-day</b> |            |    |                           |                          |
| Col              | T4         | 16 | 14.25±1.183               | 50.13±1.09               |
| OXγ-3            | T4         | 16 | 16.00±1.51*               | 51.63±1.20*              |
| OXγ-6            | T4         | 16 | 16.25±1.39*               | 51.82±0.98*              |
| <i>Ler</i>       | T4         | 16 | 8.81±0.83                 | 39.50±2.50               |
| <i>fca-1</i>     | T4         | 16 | 24.44±2.19 <sup>a</sup>   | NF <sup>§</sup>          |
| HBγ-6            | T4         | 16 | 14.38±2.156 <sup>ab</sup> | 49.67±2.60 <sup>a</sup>  |

RL, the number of rosette leaves at blotting; Flowering time, Days to the opening of the first flower.

\*\* $p<0.001$ ; \*  $p<0.05$ ; <sup>a</sup>  $p<0.05$  in comparing with *Ler*; <sup>b</sup>  $p<0.05$  in comparing with *fca-1*; ND, no records;

NF<sup>§</sup>, No flowers until the observed date.

**Table S3. Flowering phenotypes of *DnFCAβ* transgenic *Arabidopsis*.**

| Line #           | Generation | n  | RL at bolting            | Days to flowering        |
|------------------|------------|----|--------------------------|--------------------------|
| <b>Long-day</b>  |            |    |                          |                          |
| Col              | T3         | 12 | 7.63±0.82                | 28.13±1.83               |
| OXβ-5            | T3         | 12 | 7.00±0.73*               | 26.46±1.48**             |
| OXβ-7            | T3         | 12 | 7.22±0.64                | 26.18±1.41**             |
| Col              | T3         | 12 | 8.83±0.96                | 30.31±1.90               |
| OXβ-8            | T3         | 12 | 7.78±1.33*               | 28.54±1.85**             |
| OXβ-10           | T3         | 12 | 8.19±0.47*               | 28.61±1.88*              |
| Col              | T3         | 12 | 7.46±0.59                | 29.06±2.42               |
| OXβ-1            | T3         | 12 | 7.53±0.57                | 29.87±2.49               |
| OXβ-4            | T3         | 12 | 7.47±0.61                | 29.43±2.54               |
| Col              | T4         | 24 | 6.13±0.68                | 30.71±1.33               |
| OXβ-5            | T4         | 12 | 5.58±0.67*               | 32.00±1.04*              |
| OXβ-1            | T4         | 12 | 6.00±0.60                | 31.67±1.30*              |
| OXβ-4            | T4         | 12 | 5.83±0.72                | 32.83±0.58**             |
| OXβ-7            | T4         | 12 | 6.55±0.90**              | 31.45±0.69**             |
| OXβ-8            | T4         | 12 | 6.25±0.89**              | 31.08±0.45**             |
| <i>Ler</i>       | T3         | 12 | 5.58±0.79                | 31.42±1.00               |
| <i>fca-1</i>     | T3         | 10 | 7.42±0.51 <sup>a</sup>   | 33.50±0.85 <sup>a</sup>  |
| HBβ-2            | T3         | 12 | 6.25±0.97 <sup>ab</sup>  | 32.50±0.67 <sup>ab</sup> |
| HBβ-1            | T3         | 12 | 6.75±0.75 <sup>a</sup>   | 33.08±0.67 <sup>ab</sup> |
| HBβ-8            | T3         | 12 | 6.17±0.94 <sup>b</sup>   | 32.25±0.75               |
| HBβ-11           | T3         | 12 | 7.08±0.79 <sup>a</sup>   | 33.18±0.60 <sup>a</sup>  |
| <i>Ler</i>       | T4         | 12 | ND                       | 30.17±1.03               |
| <i>fca-1</i>     | T4         | 12 | ND                       | 40.25±1.75**             |
| HBβ-2            | T4         | 12 | ND                       | 40.06±3.34**             |
| HBβ-8            | T4         | 12 | ND                       | 38.94±2.93**             |
| <b>Short-day</b> |            |    |                          |                          |
| COL              | T4         | 16 | 12±0.9661                | 38.75±1.5706             |
| β-7-3            | T4         | 16 | 9.74±0.86**              | 35.19±1.36**             |
| β-8-7            | T4         | 16 | 9.38±0.50**              | 34.82±1.45**             |
| β-10-3           | T4         | 16 | 9.69±0.48**              | 35.56±1.24**             |
| <i>Ler</i>       | T4         | 16 | 8.79±0.80                | 39.50±1.51               |
| <i>fca-1</i>     | T4         | 16 | 24.40±2.16 <sup>a</sup>  | NF <sup>s</sup>          |
| HBβ-2            | T4         | 16 | 17.38±2.66 <sup>ab</sup> | 54.80±3.26 <sup>a</sup>  |
| HBβ-8            | T4         | 16 | 17.80±3.27 <sup>ab</sup> | 55.00±3.36 <sup>a</sup>  |
| HBβ-6            | T4         | 16 | 14.40±2.09 <sup>ab</sup> | 49.66±2.56 <sup>a</sup>  |

RL, the number of rosette leaves at blotting; Flowering time, Days to the opening of the first flower

\*\**p*<0.001; \* *p*<0.05; <sup>a</sup> *p*<0.05 in comparing with *Ler*; <sup>b</sup> *p*<0.05 in comparing with *fca-1*

ND, no records; NF<sup>s</sup>, No flowers until the observed date
